# Supplementary material
Source: publisher site journal article supplement (https://www.dovepress.com/article/250199)
Supplement: Supplementary file 1 [file get_supplementary_file.php]

Appendix notes

Appendix 1 is the code for running the discriminant model into clinically usable software with electronic computer technology

def DesicionTree():

x14 = int(input('\nDo you have any wheezing without strenuous exercise recently?\n'

' A. No(0)\n B. Yes(1)\n'

'Please input your score: '))

if x14 <= 0.5:

x12_1 = int(input('\nWill the weather change cause you to cough?\n'

' A. Never(0)\n B. <1 Time/week(1)\n C. 1-2 Times/week(2)\n D. >3 Times/week(3)\n'

'Please input your score: '))

x12_2 = int(input('\nDo you often cough when you don’t have a cold?\n'

' A. Never(0)\n B. <1 Time/week(1)\n C. 1-2 Times/week(2)\n D. >3 Times/week(3)\n'

'Please input your score: '))

x12 = x12_1 + x12_2

if x12 <= 4.5:

x8_1 = float(

input('\nPlease input the number of days you have been exposed to secondhand smoke per year: '))

x8_2 = float(input('\nPlease input the number of years you have been exposed to secondhand smoke: '))

x8 = x8_1 * x8_2

if x8 <= 10360:

y3 = 1

else:

x6 = int(input('\nWhich of the following was the cooking fuel you often use?\n'

' A. No(0)\n B. Electricity(1)\n C. Natural gas/liquefied gas/biogas(2)\n D. Coal(3)\n E. Firewood(4)\n'

'Please input your score: '))

if x6 <= 2.5:

y3 = 1

else:

y3 = 2

else:

y3 = 2

else:

x5 = int(input('\nDo you have any dyspnea without strenuous exercise recently?\n'

' A. Never(0)\n B. <1 Time/week(1)\n C. 1-2 Times/week(2)\n D. 3-6 Times/week(3)\n E. Daily(4)\n'

'Please input your score: '))

if x5 <= 2.5:

x13 = int(input('\nDo you often cough with sputum from your chest in the morning?\n'

' A. Never(0)\n B. <1 Time/week(1)\n C. 1-2 Times/week(2)\n D. >3 Times/week(3)\n'

'Please input your score: '))

if x13 <= 1.5:

x19 = int(input('\nWhat did you use to keep warm in childhood?\n'

' A. Central heating(0)\n B. Electricity or air conditioning(1)\n C. Coal stove(2)\n D. Firewood / brazier / fire(3)\n'

'Please input your score: '))

if x19 <= 1.5:

y3 = 1

else:

y3 = 2

else:

x11_h = float(input('\nPlease input your height(m): '))

x11_w = float(input('\nPlease input your weight(kg): '))

x11 = x11_w / (x11_h ** 2)

if x11 <= 19.21:

y3 = 3

else:

y3 = 2

else:

x16 = int(input('\nAre you a farmer?\n'

' A. No(0)\n B. Yes(1)\n'

'Please input your score: '))

if x16 <= 0.5:

x8_1 = float(

input('\nPlease input the number of days you have been exposed to secondhand smoke per year: '))

x8_2 = float(input('\nPlease input the number of years you have been exposed to secondhand smoke: '))

x8 = x8_1 * x8_2

if x8 <= 8562.5:

y3 = 2

else:

y3 = 2

else:

x18 = int(input('\nWhich of the following is your kitchen ventilation?\n'

' A. Range hood(0)\n B. Ventilation fan(1)\n C. Chimney(2)\n D. No(3)\n'

'Please input your score: '))

if x18 <= 1.5:

y3 = 2

else:

y3 = 3

return y3

def main():

y3 = DesicionTree()

if y3 == 1:

print('\nYou have a high probability of not suffering from COPD.\nPulmonary function test is not needed currently.')

elif y3 == 2:

print('\nYou have a high probability of COPD(GOLDⅠ+Ⅱ).\nIt is recommended that you have to go to the hospital to take a pulmonary function test!')

elif y3 == 3:

print('\nYou have a high probability of COPD(GOLDⅢ+Ⅳ).\nIt is recommended that you have to go to the hospital to take a pulmonary function test!')

else:

print('\nError!')

if __name__ == '__main__':

main()
